# Supplementary material
Source: PubMed Central journal article supplement (PMC5643216)
Supplement: NIHMS870262-supplement-Statistical_Review.pdf [file NIHMS870262-supplement-Statistical_Review.pdf]

College Of Medicine - Jacksonville  
Center for Health Equity and Quality Research

580 W. 8<sup>th</sup> Street  
Tower 2, Suite 6015  
Jacksonville, FL 32209  
904-244-9620  
904-244-9234 Fax

April 12, 2017

Dr. Irshad Chaudry

Editor-in-Chief  
Shock

Re: SHOCK-D-17-00132

Title: The Predictive Ability of Dysfunctional High Density Lipoprotein for Adverse Outcomes in  
Emergency Department Patients with Sepsis or Septic Shock

Dear Dr. Chaudry,

Reviewer 1 is correct that a formal power analysis and power calculation was not performed because the sample size was determined by the number of available patients. Additionally, this was a pilot data as mentioned in the manuscript. In general, for pilot studies, formal power calculations are not performed. Furthermore, a post-hoc power analysis is only generally completed to evaluate if the power was not sufficient to achieve significance. In this case, given statistically significant results, there would be no need for a power calculation.

Sincerely,



Dr. Shiva Gautam, PhD  
Professor  
Department of Medicine  
University of Florida, College of Medicine – Jacksonville  
Affiliate Professor  
Department of Biostatistics  
College of Public Health and Health Profession  
University of Florida - Gainesville
